# Supplementary material for: Conditional survival to assess prognosis in patients with chronic lymphocytic leukemia
Source: Springer Nature journal article supplement (doi:10.1007/s00277-024-05627-w), 2024-02-03
Supplement: MOESM2 [file 26696816]

## Supplemental Methods

### *Assessment of biological and molecular biomarkers*

Beta-2-microglobulin (B2MG) was measured in serum as part of routine clinical practice. Quantification (mg/l) was performed according to standardized laboratory tests, normal range for B2MG was defined as  $\leq 3.5$  mg/l.

Genomic aberrations were detected by fluorescent in situ hybridization (FISH) according to local standard procedures. At least 200 interphase cells were examined. Deletion (del) 17p was used as the sole marker of *TP53* deficiency.

*IGHV* mutation status was assessed according to local standards based on the procedure described previously. *IGHV* sequence homology of less than 98% compared to germline was considered mutated.
